# Supplementary material for: Mutual Influence of ROS, pH, and CLIC1 Membrane Protein in the Regulation of G1–S Phase Progression in Human Glioblastoma Stem Cells
Source: Oxford University Press journal article supplement (doi:10.1158/1535-7163.mct-17-1223), 2018-08-22
Supplement: 15357163mct171223-sup-193667_3_supp_4946970_pd328x.docx [file 15357163mct171223-sup-193667_3_supp_4946970_pd328x.docx]

***
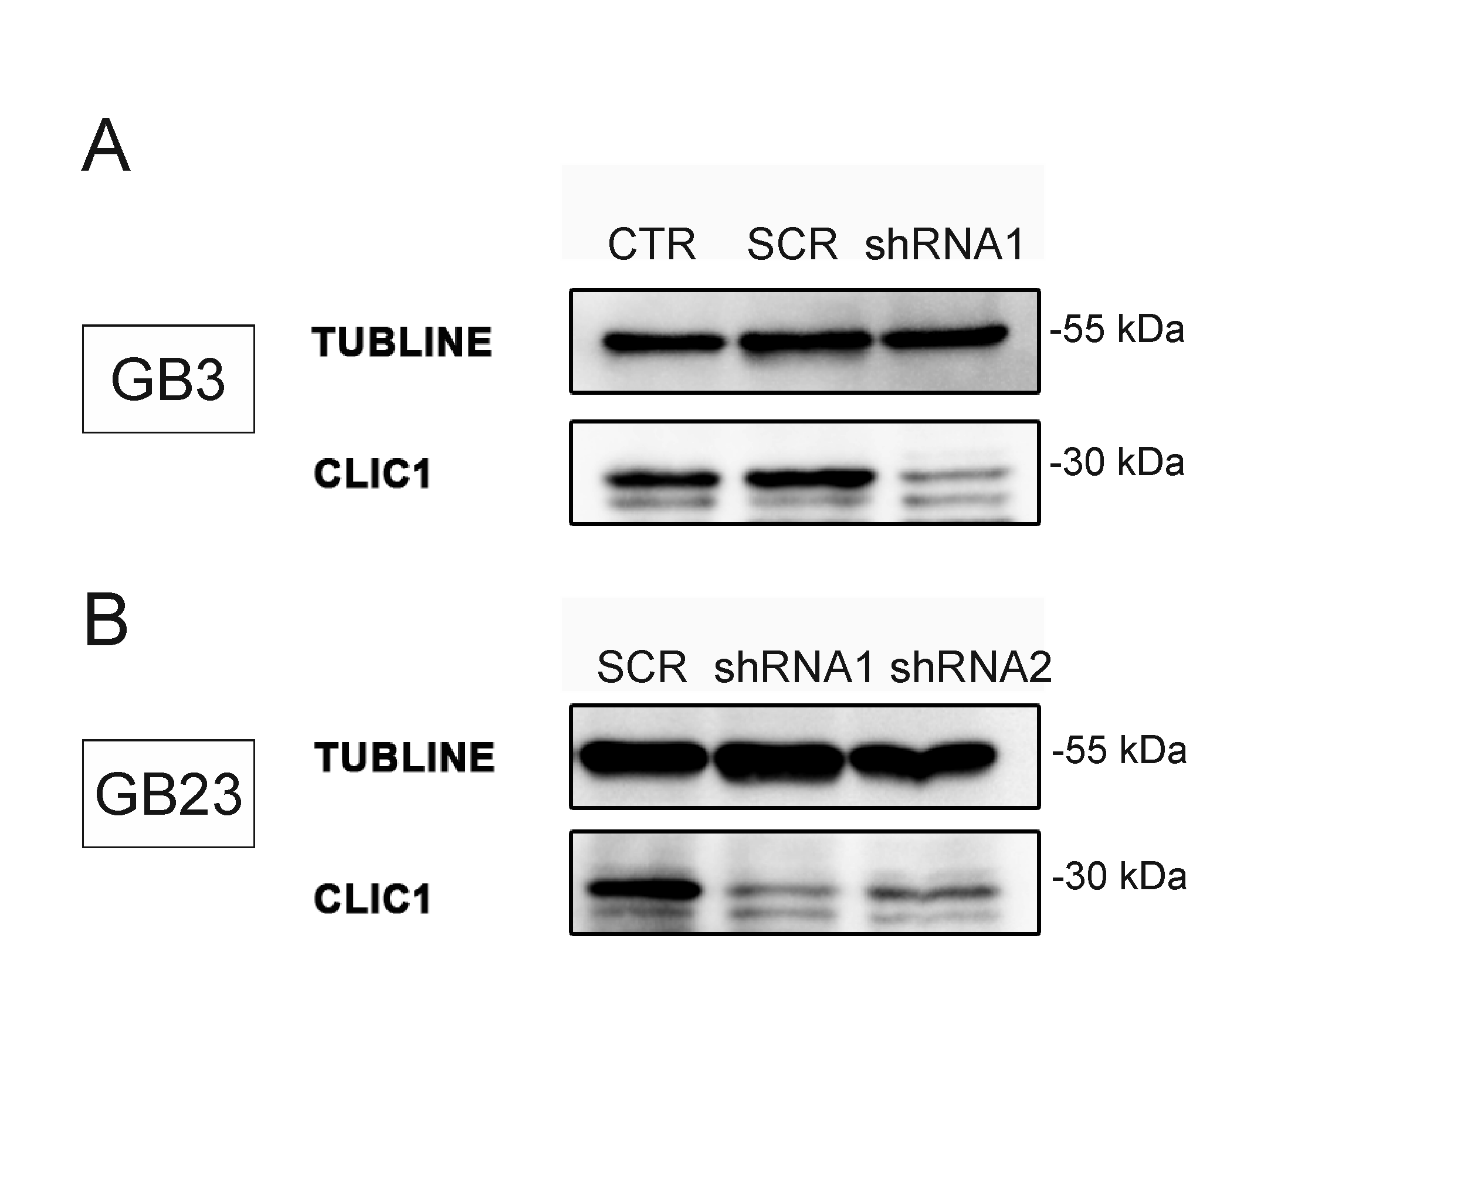
***

***Figure S2.*** *CLIC1 silencing western blot.* ***A:*** *GB3 CSC extract from cells in control conditions, from infected glioblastoma stem cell with the empty vector and with shRNA1 against the amino terminal of CLIC1 protein.* ***B:*** *GB23 CSC extract from virus infected CSCs with scrambled, shRNA1 and shRNA2 interfered constructs.*
