# Supplementary material for: Mutual Influence of ROS, pH, and CLIC1 Membrane Protein in the Regulation of G1–S Phase Progression in Human Glioblastoma Stem Cells
Source: Oxford University Press journal article supplement (doi:10.1158/1535-7163.mct-17-1223), 2018-08-22
Supplement: 15357163mct171223-sup-193667_3_supp_4946975_pd328y.docx [file 15357163mct171223-sup-193667_3_supp_4946975_pd328y.docx]

***
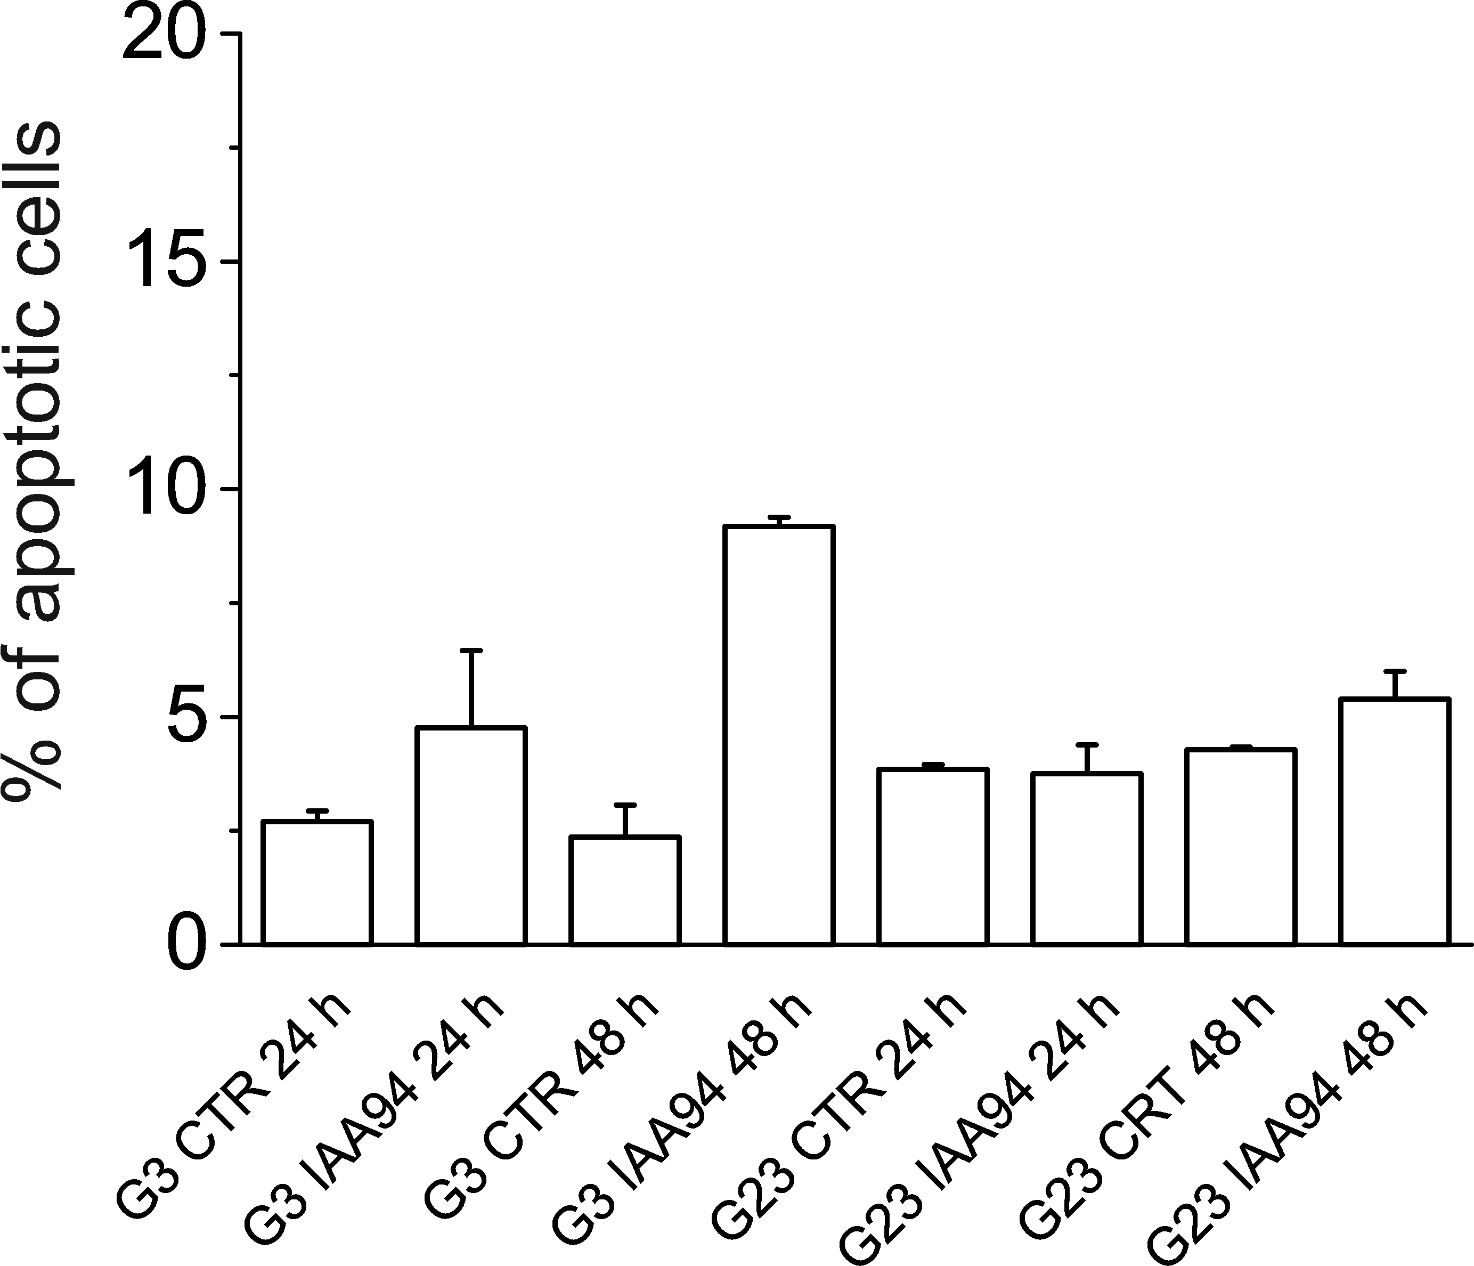
***

***Figure S6:*** *Effect of IAA on apoptosis in GB CSCs****.*** *Cells (GB3, GB23) were treated with vehicle or IAA94 for 24 h and 48 h and stained with Annexin V conjugated to fluorescein isothiocyanate (FITC) to observe apoptotic cells, and counterstained with propidium iodide (PI) to determine the proportion of necrotic cells using the Apoptosis Detection Kit (eBioscience) according to the manufacturer's instructions. Each sample was analyzed with flow cytometry using a FACScalibur (BD Bioscience) recording at least 10,000 events per sample. The percentage of cell death was the sum of the percentages of early and late apoptosis. Forty-eight hours of treatment with IAA induced a statistically significant increase in the percentage of apoptotic cells (9.2%) compared with vehicle-treated controls (2.4%) in GBM3 cells, while IAA-induced apoptosis was less evident in GBM23 cells (5.4% after 48h) and did not reach statistical significance. Data are the mean ± S.E.M. of percentages of Annexin V-positive cells. (* p < 0.05).*
